# Supplementary material
Source: PubMed Central journal article supplement (PMC3749268)
Supplement: NIHMS476185-supplement-01.pdf [file NIHMS476185-supplement-01.pdf]

**Supplementary Table 1. Pooled multivariate relative risk (RR) and 95% confidence interval (CI) for colorectal cancer according to cumulative alcohol intake, stratified by one-carbon nutrients and family history of colorectal cancer in post-fortification period (1998-2008)**

| Alcohol (g/d)                                   | 0    | 0.1-4.9          | 5.0-9.9          | 10-14.9          | 15-29.9          | 30+              | <i>P</i> for trend |
|-------------------------------------------------|------|------------------|------------------|------------------|------------------|------------------|--------------------|
| <b>Vitamin B6</b>                               |      |                  |                  |                  |                  |                  |                    |
| High (>3.9 for women; >4.3 for men; median)     |      |                  |                  |                  |                  |                  |                    |
| No. of cases                                    | 133  | 120              | 56               | 41               | 55               | 30               |                    |
| Multivariate RR*                                | 1.00 | 1.08 (0.83-1.40) | 1.19 (0.85-1.66) | 0.97 (0.66-1.42) | 1.43 (1.00-2.03) | 1.33 (0.78-2.25) | 0.29               |
| Low (<=3.9 for women; <=4.3 for men; median)    |      |                  |                  |                  |                  |                  |                    |
| No. of cases                                    | 179  | 151              | 72               | 59               | 64               | 38               |                    |
| Multivariate RR*                                | 1.00 | 1.05 (0.84-1.32) | 1.20 (0.90-1.59) | 1.08 (0.78-1.51) | 1.25 (0.90-1.72) | 1.05 (0.71-1.55) | 0.53               |
| <i>P</i> for interaction                        |      |                  |                  |                  |                  | 0.40             |                    |
| <b>Vitamin B12</b>                              |      |                  |                  |                  |                  |                  |                    |
| High (>12.4 for women; >13.7 for men; median)   |      |                  |                  |                  |                  |                  |                    |
| No. of cases                                    | 134  | 120              | 64               | 39               | 58               | 29               |                    |
| Multivariate RR*                                | 1.00 | 0.97 (0.75-1.25) | 1.22 (0.69-2.12) | 0.86 (0.58-1.27) | 1.33 (0.79-2.24) | 1.07 (0.68-1.67) | 0.17               |
| Low (<=12.4 for women; <=13.7 for men; median)  |      |                  |                  |                  |                  |                  |                    |
| No. of cases                                    | 178  | 151              | 64               | 61               | 61               | 39               |                    |
| Multivariate RR*                                | 1.00 | 1.09 (0.87-1.36) | 1.10 (0.81-1.48) | 1.18 (0.82-1.72) | 1.17 (0.84-1.64) | 1.19 (0.82-1.75) | 0.41               |
| <i>P</i> for interaction                        |      |                  |                  |                  |                  | 0.69             |                    |
| <b>Betaine</b>                                  |      |                  |                  |                  |                  |                  |                    |
| High (>91.5 for women; >116.6 for men; median)  |      |                  |                  |                  |                  |                  |                    |
| No. of cases                                    | 147  | 116              | 64               | 52               | 61               | 37               |                    |
| Multivariate RR*                                | 1.00 | 0.88 (0.67-1.15) | 1.10 (0.80-1.50) | 0.98 (0.68-1.41) | 1.29 (0.91-1.83) | 1.27 (0.83-1.94) | 0.10               |
| Low (<=91.5 for women; <=116.6 for men; median) |      |                  |                  |                  |                  |                  |                    |

|                                                  |      |                  |                  |                  |                  |                  |      |
|--------------------------------------------------|------|------------------|------------------|------------------|------------------|------------------|------|
| No. of cases                                     | 165  | 155              | 64               | 48               | 59               | 31               |      |
| Multivariate RR*                                 | 1.00 | 1.18 (0.94-1.49) | 1.16 (0.79-1.73) | 0.95 (0.67-1.34) | 1.16 (0.84-1.61) | 1.02 (0.67-1.54) | 0.91 |
| <i>P</i> for interaction                         |      |                  |                  |                  |                  | 0.52             |      |
| <b>Choline</b>                                   |      |                  |                  |                  |                  |                  |      |
| High (>291.4 for women; >360.8 for men; median)  |      |                  |                  |                  |                  |                  |      |
| No. of cases                                     | 143  | 142              | 67               | 52               | 62               | 26               |      |
| Multivariate RR*                                 | 1.00 | 1.15 (0.90-1.47) | 1.28 (0.94-1.75) | 1.17 (0.82-1.66) | 1.43 (1.02-2.03) | 1.06 (0.67-1.70) | 0.41 |
| Low (<=291.4 for women; <=360.8 for men; median) |      |                  |                  |                  |                  |                  |      |
| No. of cases                                     | 169  | 129              | 60               | 47               | 57               | 42               |      |
| Multivariate RR*                                 | 1.00 | 1.00 (0.79-1.27) | 1.06 (0.69-1.62) | 0.92 (0.65-1.31) | 1.16 (0.83-1.61) | 1.22 (0.84-1.78) | 0.20 |
| <i>P</i> for interaction                         |      |                  |                  |                  |                  | 0.64             |      |
| <b>Methionine</b>                                |      |                  |                  |                  |                  |                  |      |
| High (>1.5 for women; >1.9 for men; median)      |      |                  |                  |                  |                  |                  |      |
| No. of cases                                     | 153  | 132              | 60               | 48               | 63               |                  |      |
| Multivariate RR*                                 | 1.00 | 0.90 (0.70-1.15) | 0.96 (0.58-1.59) | 0.95 (0.66-1.37) | 0.96 (0.68-1.35) |                  | 0.96 |
| Low (<=1.5 for women; <=1.9 for men; median)     |      |                  |                  |                  |                  |                  |      |
| No. of cases                                     | 159  | 139              | 67               | 52               | 124              |                  |      |
| Multivariate RR*                                 | 1.00 | 1.19 (0.94-1.51) | 1.31 (0.97-1.77) | 1.04 (0.74-1.46) | 1.39 (1.06-1.83) |                  | 0.03 |
| <i>P</i> for interaction                         |      |                  |                  |                  |                  |                  | 0.05 |
| <b>Family history of colorectal cancer</b>       |      |                  |                  |                  |                  |                  |      |
| Yes                                              |      |                  |                  |                  |                  |                  |      |
| No. of cases                                     | 74   | 51               | 31               | 22               | 31               |                  |      |
| Multivariate RR*                                 | 1.00 | 0.93 (0.54-1.61) | 1.40 (0.88-2.24) | 1.03 (0.45-2.34) | 1.09 (0.27-4.49) |                  | 0.82 |
| No                                               |      |                  |                  |                  |                  |                  |      |
| No. of cases                                     | 238  | 220              | 97               | 77               | 156              |                  |      |

|                          |      |                  |                  |                  |                  |      |
|--------------------------|------|------------------|------------------|------------------|------------------|------|
| Multivariate RR*         | 1.00 | 1.11 (0.92-1.34) | 1.08 (0.76-1.54) | 1.03 (0.78-1.35) | 1.28 (0.85-1.91) | 0.27 |
| <i>P</i> for interaction |      |                  |                  |                  | 0.86             |      |

---

\*Multivariate RRs are adjusted for age, gender (combined data only), total pack-years of smoking (<10, 10-<30, 30-<50, 50-<70, 70+), physical activity (quintiles of metabolic equivalent tasks/wk), body mass index (BMI) (<23, 23-<25, 25-<30, 30-<35, and 35+ kg/m<sup>2</sup>), height (continuous), family history of colorectal cancer in parents and siblings (yes, no), history of endoscopy (yes, no), aspirin use (never, past, current use of 1-2, ≥3 tablets/wk), postmenopausal hormone (PMH) use (only in women; premenopausal, never, past, and current), red meat intake (quintiles), calcium intake from foods (continuous), total folate intake (quintiles at baseline), and total energy intake (continuous).
